# Supplementary material for: Risk Reduction for End-Stage Renal Disease by Dietary Guidance Using the Gustatory Threshold Test for Salty Taste
Source: MDPI journal article supplement (doi:10.3390/nu12092703), 2020-09-04
Supplement: s1 [file s1]

< Supplementary Materials >

Table S1. Administration of drugs in the two groups

|                           | All (277)   | Group A (141) | Group B (136) | P value |
|---------------------------|-------------|---------------|---------------|---------|
| ACE-I•ARB, %              | 69.0% (191) | 71.1% (101)   | 66.7% (90)    | 0.44    |
| CCB, %                    | 71.5% (198) | 78.2% (111)   | 64.4% (87)    | 0.02    |
| $\beta$ blocker, %        | 22.4% (62)  | 21.1% (30)    | 23.7% (32)    | 0.67    |
| Diuretic, %               | 46.9% (130) | 40.9% (58)    | 53.3% (72)    | 0.04    |
| Vitamin D, %              | 24.9% (69)  | 22.5% (32)    | 27.4% (37)    | 0.40    |
| Phosphate binder, %       | 9.7% (27)   | 3.5% (5)      | 16.3% (22)    | <0.001  |
| Potassium binder, %, %    | 22.4% (62)  | 16.9% (24)    | 28.2% (38)    | 0.03    |
| Bicarbonate, %            | 22.7% (63)  | 20.4% (29)    | 25.2% (34)    | 0.39    |
| ESA, %                    | 26.0% (72)  | 20.4% (29)    | 31.9% (43)    | 0.04    |
| Carbon adsorbent, %       | 21.7% (60)  | 14.8% (21)    | 28.9% (39)    | 0.005   |
| Insulin, %                | 14.8% (41)  | 15.5% (22)    | 14.1% (19)    | 0.87    |
| GLP-1 agonist, %          | 5.1% (14)   | 8.5% (12)     | 1.48% (2)     | 0.01    |
| Oral antidiabetic drug, % | 27.1% (75)  | 31.7% (45)    | 22.2% (30)    | 0.08    |
| Statin, %                 | 45.1% (125) | 47.2% (67)    | 43.0% (58)    | 0.55    |

Categorical variables are presented as percentage or number. P-values were statistically analyzed using the chi-square test.

ACE-I: Angiotensin-converting enzyme inhibitor, ARB: Angiotensin receptor blocker, ESA: erythropoiesis stimulating agent, GLP-1: Glucagon-like peptide-1

Table S2: Characteristics of the propensity score-matched cohort

|                                  | Group A (105)                       | Group B (105)                       | P value |
|----------------------------------|-------------------------------------|-------------------------------------|---------|
| Age, year                        | 69.8 ± 12.2                         | 69.6 ± 11.2                         | 0.92    |
| Male, %                          | 61.0% (64)                          | 63.8% (67)                          | 0.78    |
| BMI, kg/m <sup>2</sup>           | 23.4 ± 4.7                          | 23.2 ± 3.5                          | 0.85    |
| Diabetes mellitus, %             | 43.7% (49)                          | 46.7% (49)                          | 1.0     |
| eGFR, ml/min/1.73 m <sup>2</sup> | 20.4 ± 9.2                          | 20.0 ± 9.3                          | 0.74    |
| CKD stage, %                     | G3: 16.2%<br>G4: 51.4%<br>G5: 32.4% | G3: 14.3%<br>G4: 52.4%<br>G5: 33.3% |         |
| Hb, g/dL                         | 11.3 ± 1.3                          | 11.3 ± 1.6                          | 0.81    |
| SBP, mmHg                        | 137.3 ± 21.6                        | 138.1 ± 21.7                        | 0.76    |
| UPCR <sup>a</sup> , g/gCr        | 1.46 (0.60 - 3.15)                  | 1.49 (0.25 - 3.84)                  | 0.70    |

Continuous variables are presented as mean standard deviation and categorical variables as percentage or number. P-values were statistically analyzed using the Student's t-test and Mann-Whitney U test for continuous variables and chi-square test for categorical variables.

BMI: body mass index, eGFR: estimated glomerular filtration rate, Hb: hemoglobin, SBP: systolic blood pressure, UPCR: urinary protein-creatinine ratio

<sup>a</sup> Median (interquartile range)

Table S3: Stratified analysis according to the CKD stage

a) Changes in  $\Delta$ eGFR at admission and 6 months after admission.

| CKD stage | Group A (141)   | Group B (136)    | P value |
|-----------|-----------------|------------------|---------|
| G3        | 0.81 $\pm$ 2.49 | -0.29 $\pm$ 1.95 | 0.12    |
| G4        | 1.15 $\pm$ 2.02 | 0.44 $\pm$ 1.42  | 0.02    |
| G5        | 0.16 $\pm$ 1.10 | -0.01 $\pm$ 0.71 | 0.38    |

P-values were statistically analyzed using the Student's t-test.

b) Dialysis induction rate within one year after admission

| CKD stage | Group A (141) | Group B (136) | P value |
|-----------|---------------|---------------|---------|
| G3        | 2.9% (1)      | 6.3% (1)      | 0.54    |
| G4        | 4.3% (3)      | 7.6% (5)      | 0.48    |
| G5        | 21.6% (8)     | 46.3% (25)    | 0.03    |

P-values were statistically analyzed using the chi-square test.

eGFR: estimated glomerular filtration rate; CKD: chronic kidney disease
